# Supplementary material for: Enhancing the endogenous triboelectricity of a polylactic acid nanofiber film by controlling the MXene content and distribution
Source: Royal Society of Chemistry journal article supplement (doi:10.1039/d2ta05905c), 2022-01-01
Supplement: d2ta05905c1.pdf [file d2ta05905c1.pdf]

## Supporting Information

### **Enhancing the endogenous triboelectricity of a polylactic acid nanofiber film by controlling the MXene content and distribution**

Panpan Zhang, Wangshu Tong\*, Ce Liang, Yiyuan Chen, Yulun Liu, Zhihao Wang and Yihe Zhang\*

Beijing Key Laboratory of Materials Utilization of Nonmetallic Minerals and Solid Wastes, National Laboratory of Mineral Materials, School of Materials Science and Technology, China University of Geosciences (Beijing), Beijing 100083, China

\*Correspondence author. E-mail: [tong@cugb.edu.cn](mailto:tong@cugb.edu.cn); [zyh@cugb.edu.cn](mailto:zyh@cugb.edu.cn).

Table S1. The detailed calculation parameters of the “number of contacts” of PLA films under different voltages.

| Sample | D/ $\mu\text{m}$ | N  | $\lambda/\mu\text{m}$ | v   |
|--------|------------------|----|-----------------------|-----|
| 12 kV  | 1.09             | 22 | 6.46                  | 150 |
| 15 kV  | 0.85             | 31 | 6.36                  | 225 |
| 18 kV  | 0.83             | 40 | 6.43                  | 371 |
| 21 kV  | 0.81             | 23 | 7.01                  | 143 |

The total fiber length (L) is the sum of all fibers in the image at the same magnification under SEM. According to the formula,  $L = N\lambda$ ; hence, we calculate the total fiber length by calculating the number of fibers (N) and the length of single fiber ( $\lambda$ ). As the electrospun fiber film is composed of a stack comprising numerous fibers, the SEM image contains both the top layer fibers and upper inner fibers, which represent a typical part of the whole fiber with a certain area and thickness. SEM showed the different PLA nanofiber films with the same volume. Therefore, according to the statistics derived from the SEM results, the number of contacts in a certain volume can be calculated; thus, the whole contact number of a film can be calculated using the film size. In this study, only the contact number in the SEM view was calculated as the final “number of contacts”, because the indefinite depth shown in the SEM view could not calculate the final volume of the whole film. However, the part contact number is still effective for evaluating the generation performance of the whole film, because all samples used in the generation tests have the same area and thickness. Thus, the real “number of contacts” of the whole film can be calculated by multiplying the part contact number provided in this study with the same factor (same volume). Thus, the comparison of the part contact numbers can represent a comparison of the whole contact numbers.

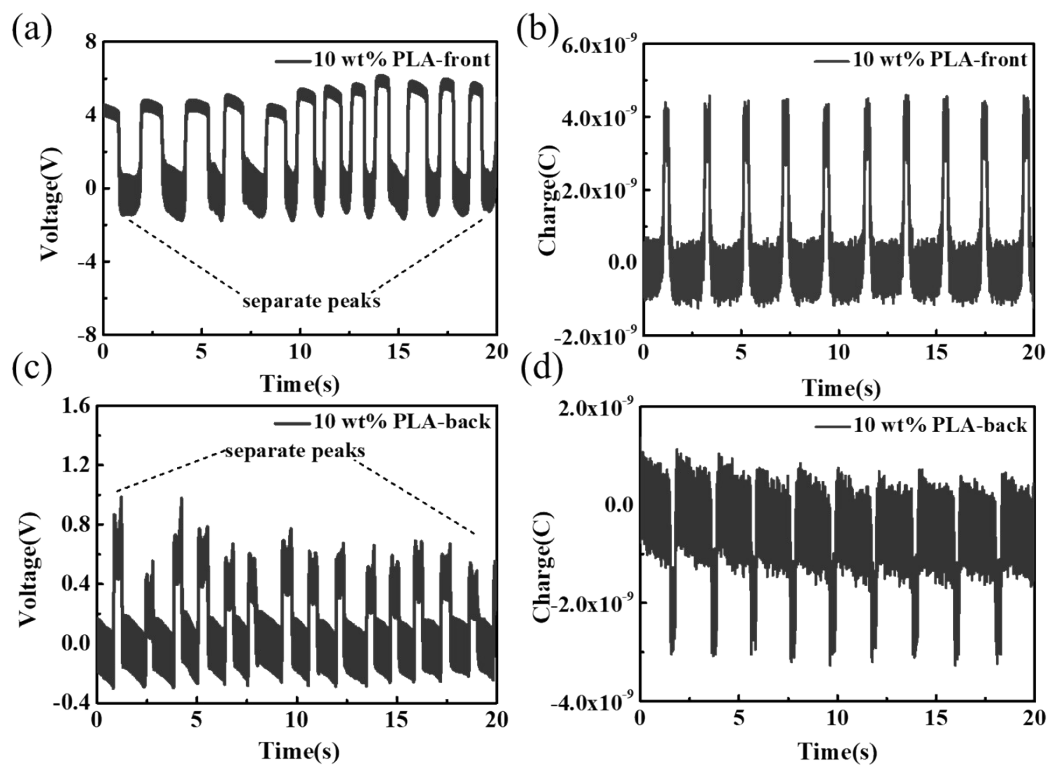

Fig. S1. The  $V_{oc}$  and  $C$  on the positive and negative sides of PLA nanofiber film. (a) and (b) are the positive side of PLA film; (c) and (d) are the negative side of PLA film.

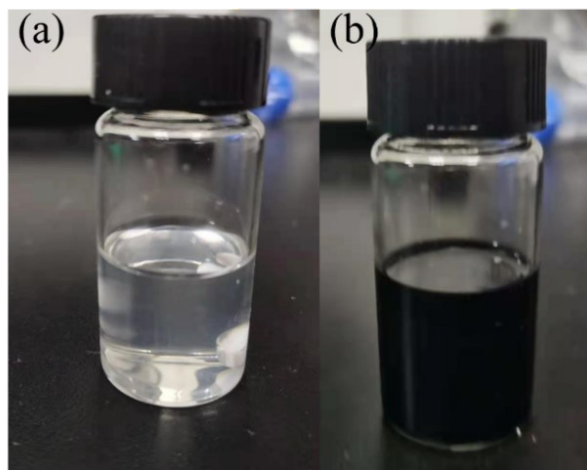

Fig. S2. The photographic images of (a) 10% PLA solution, and (b) MXene/PLA (PMX) solution.

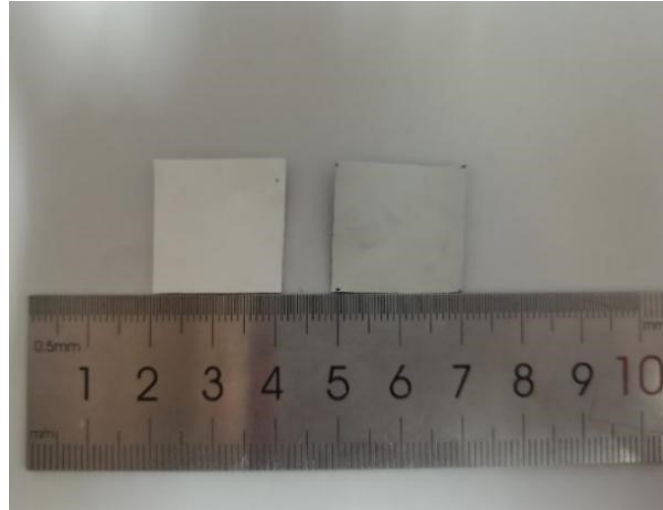

Fig. S3. The photographs of PLA (left), MXene/PLA (PMX) nanofiber films (right).

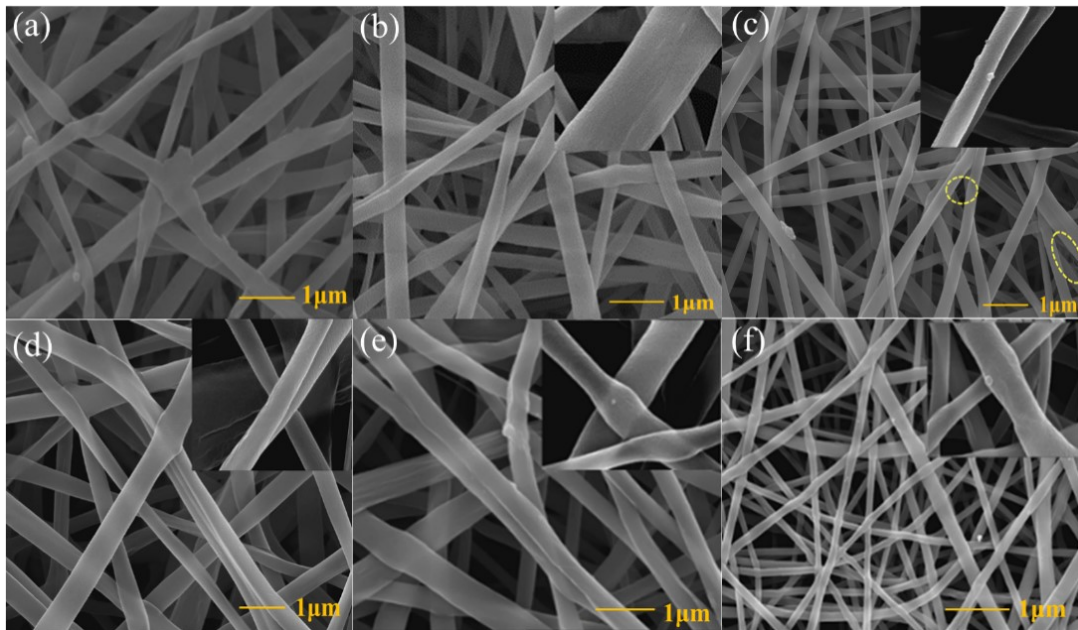

Fig. S4. SEM images of PMX nanofiber films with 0 - 2.5 wt% MXene content. (a)-0, (b)-0.5 wt%, (c)-1 wt%, (d)-1.5 wt%, (e)-2 wt%, (f)-2.5 wt%.

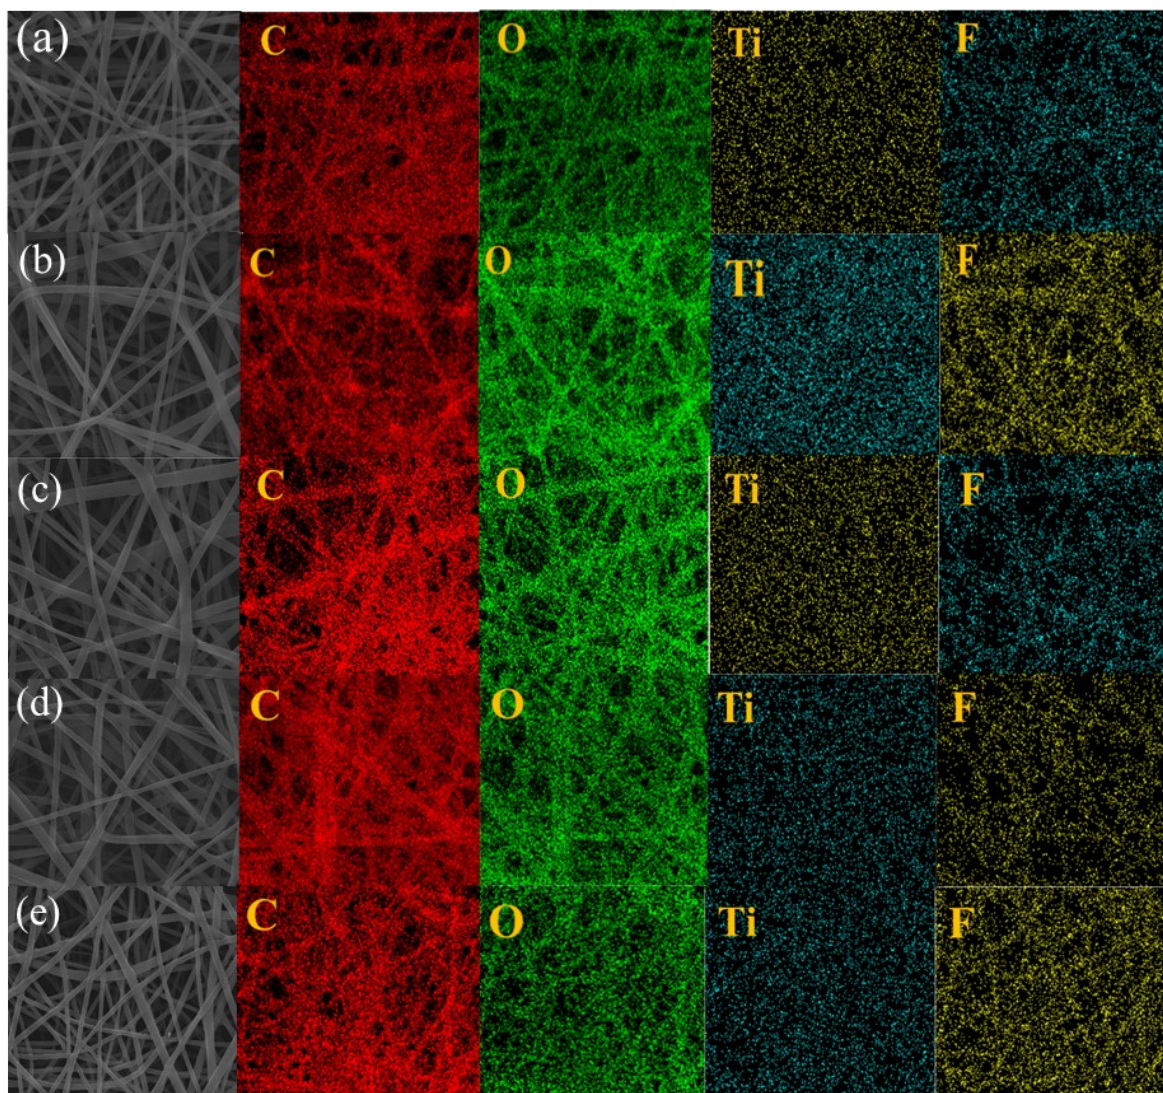

Fig. S5. EDS spectra of PMX for various wt% of MXene in PLA, (a) 0.5 wt %, (b) 1 wt %, (c) 1.5 wt %, (d) 2 wt %, (e) 2.5 wt %.

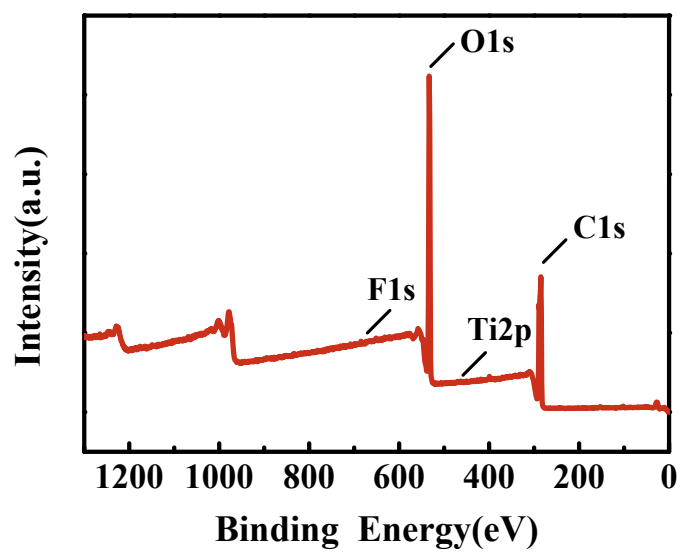

Fig. S6. The full spectrum XPS of 1wt% PMX nanofibers.

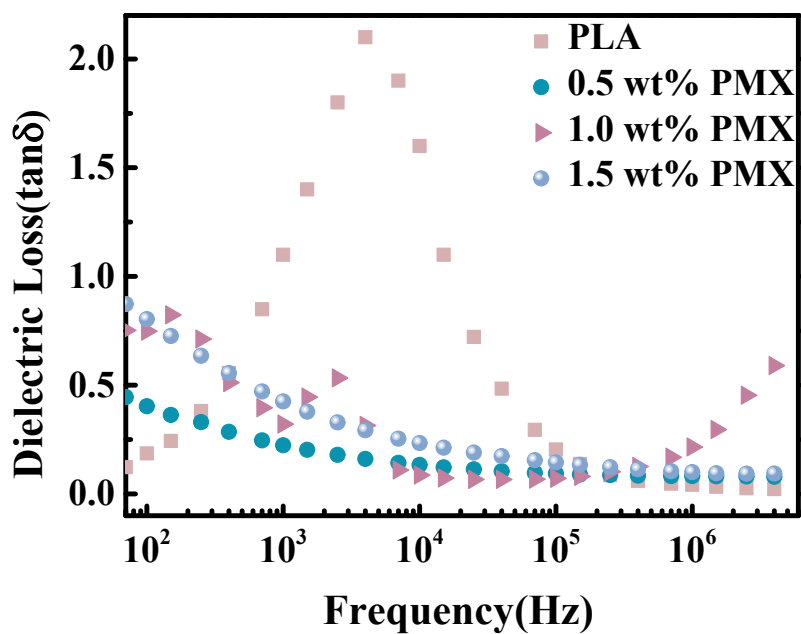

Fig. S7. The dielectric loss diagram of PMX films with different MXene content.

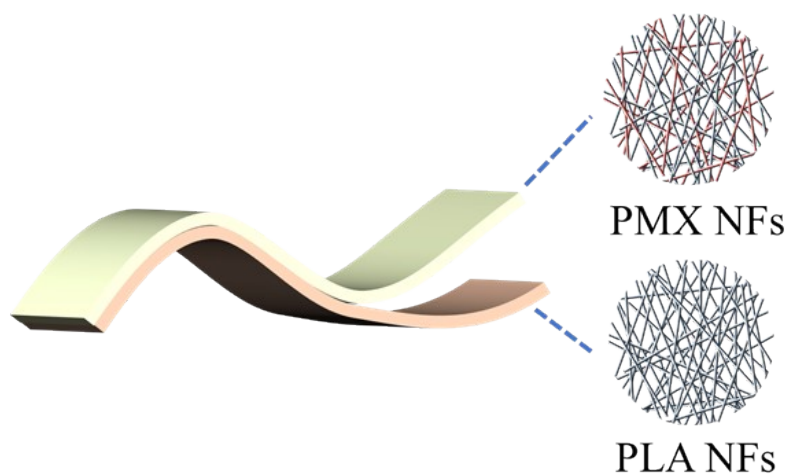

Fig. S8. The structure diagram of D-M bilayer film.

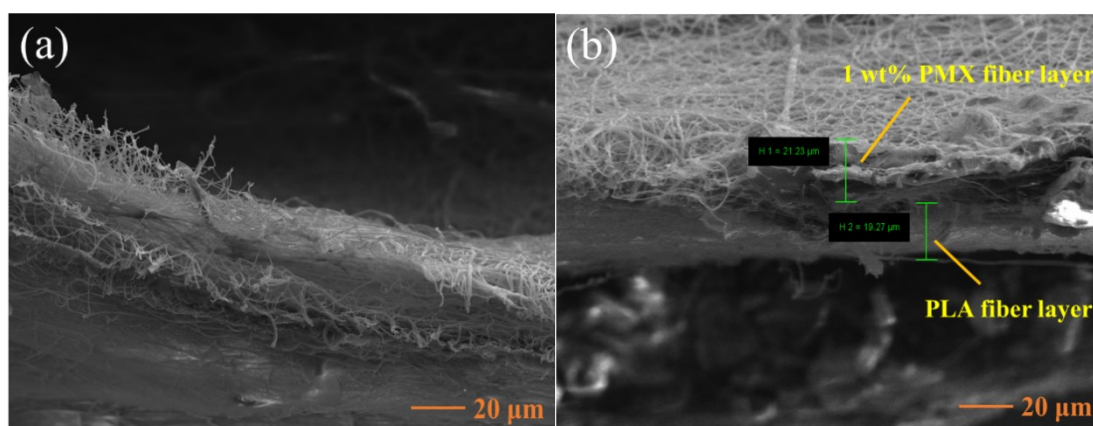

Fig. S9. The cross section of D-M bilayer film.

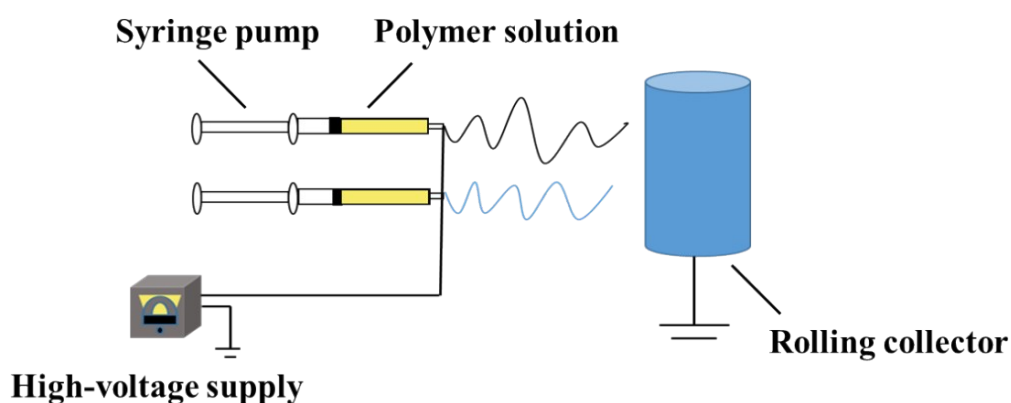

Fig. S10. The preparation schematic diagram of B-M film.

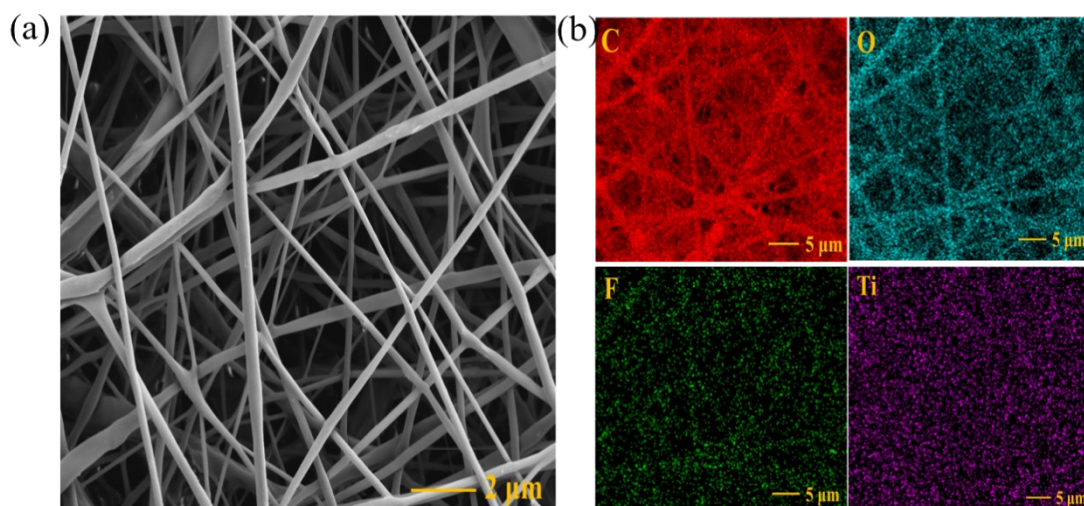

Fig. S11. (a) The SEM and (b) EDS spectras of B-M film.

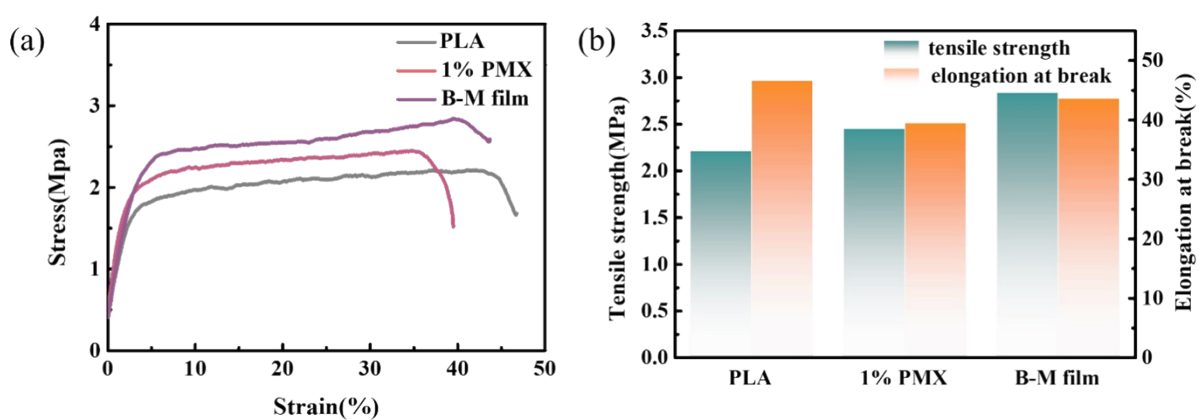

Fig. S12. (a) Stress-strain curves, (b) tensile strength and elongation at break of PLA, 1%PMX and B-M nanofiber films.

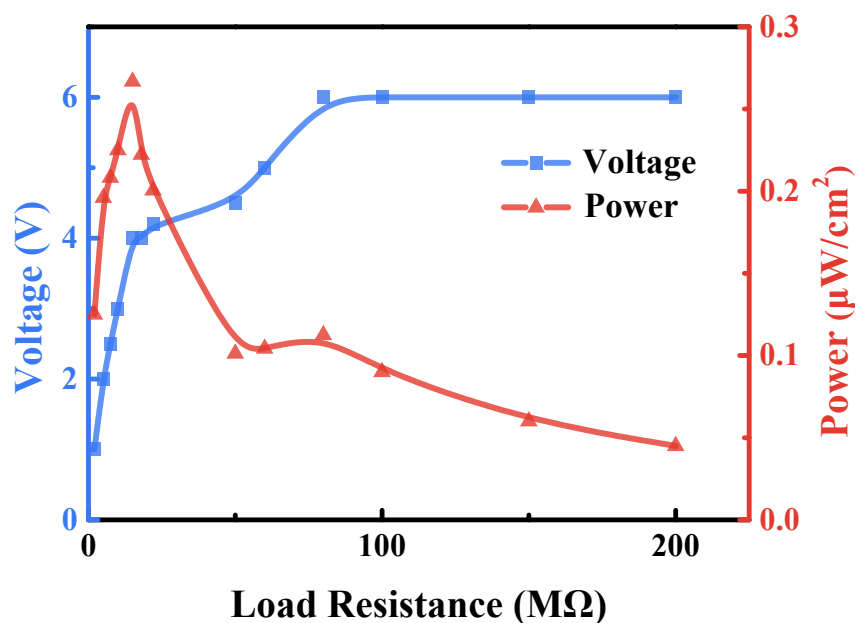

Fig. S13. The output voltage ( $V_{oc}$ ) and output power of PLA nanofiber film.

Table S2. Comparison of output performance of the B-M endogenous TENG with PENGs reported in the literature.

| Material                                      | preparation method         | electrode             | $V_{oc}/V$ | $I_{sc}$             | $\mu W/cm^2$ |
|-----------------------------------------------|----------------------------|-----------------------|------------|----------------------|--------------|
| PVDF/MgCr <sub>2</sub> O <sub>4</sub>         | electrospinning            | Cu                    | 1.05       |                      | 0.51         |
| KNNS-BNKZ                                     | electrospinning            | Cu                    | 10         |                      | 0.5          |
| PVDF-TrFE/BCZT                                | electrospinning            | copper-clad<br>Kapton | 10         | 0.75μA               | 2.91         |
| BaTiO <sub>3</sub> nanofiber(vertically)/PDMS | electrospinning            | Cu                    | 2.67       | 261.4nA              | 0.184        |
| BTO@HBP@PMMA                                  | electrospinning            | Cu                    | 3.4        | 0.32μA               | 5.25         |
| PVDF-MWCNT                                    | solution coating           | Ag                    | 12         | 30nA/cm <sup>2</sup> |              |
| Li Ta-KNN/PVDF                                | electrospinning            | Au                    | 5.6        |                      | 9.7          |
| Annealed ZnO:PDMS                             | co-precipitation<br>method | Cu                    | 5          | 6μA                  | 9.55         |
| oriented PVDF                                 | electrospinning            | Al                    | 14         |                      | 1.22         |
| fish bladder                                  | electrospinning            | Cu/Ag                 | 10         | 51nA                 | 4.15         |
| ZnO NRs/PAN                                   | electrospinning            | Cu                    | 6.5        |                      | 10.8         |
| PVDF-MoS <sub>2</sub>                         | electrospinning            | Cu                    | 13.8       |                      | 0.16         |
| this work (MXene/PLA)                         | electrospinning            | carbon paper          | 15         | 0.65μA               | 4.55         |
